# Supplementary material
Source: publisher figshare collection journal article supplement (https://acs.figshare.com/ndownloader/files/5702787)
Supplement: Supplementary file 1 [file 5702787]

# ic9510167.cif

#===============================================================================
data_global
#===============================================================================

# 1. SUBMISSION DETAILS - - MANUSCRIPT IC9510167

_publ_contact_author       #Name and address of author for correspondence
;
Kattesh V. Katti
Center for Radiological Research and MURR
University of Missouri
Columbia, MO 65211
;
_publ_contact_author_phone     ?
_publ_contact_author_fax       ?
_publ_contact_author_email     ?

_publ_requested_journal         Inorganic_Chemistry
_publ_requested_coeditor_name  ?

_publ_contact_letter
;
 ? #Insert text if wanted
;

#===============================================================================

# 2. PROCESSING SUMMARY  (IUCr Office Use Only)

_journal_date_recd_electronic  ?
_journal_date_to_coeditor      ?
_journal_date_from_coeditor    ?
_journal_date_accepted         ?
_journal_date_printers_first   ?
_journal_date_printers_final   ?
_journal_date_proofs_out       ?
_journal_date_proofs_in        ?
_journal_coeditor_name         ?
_journal_coeditor_code         ?
_journal_coeditor_notes
; ?
;
_journal_techeditor_code       ?
_journal_techeditor_notes
; ?
;
_journal_coden_ASTM            ?
_journal_name_full             ?
_journal_year                  ?
_journal_volume                ?
_journal_issue                 ?
_journal_page_first            ?
_journal_page_last             ?
_journal_suppl_publ_number      ?
_journal_suppl_publ_pages       ?

#===============================================================================

# 3. TITLE AND AUTHOR LIST

_publ_section_title
;
Chemistry in Environmentally Benign Media: Part 3. Synthesis and ...
;
# The loop structure below should contain the names and addresses of all
# authors, in the required order of publication. Repeat as necessary.

loop_
        _publ_author_name
        _publ_author_address
'V. Sreenivasa Reddy'
;
Center for Radiological Research and MURR
University of Missouri
Columbia, MO 65211
;
'Douglas E. Berning'
;
Center for Radiological Research and MURR
University of Missouri
Columbia, MO 65211
;
'Kattesh Katti'
;
Center for Radiological Research and MURR
University of Missouri
Columbia, MO 65211
;
'Charles L. Barnes'
;
Department of Chemistry
University of Missouri
Columbia, MO 65211
;
'Wynn A. Volkert'
;
H.S. Truman Memorial VA Hospital
Columbia, MO 65211
;
'A.R. Kettring'
;
Center for Radiological Research and MURR
University of Missouri
Columbia, MO 65211
;

#===============================================================================

# 4. TEXT
_publ_section_abstract
;
 ?  #Insert appropriate text here if wanted.
;
_publ_section_comment
;
 ?  #Insert appropriate text here if wanted.
;
_publ_section_experimental
;
 ?  #Insert appropriate text here if wanted.
;
_publ_section_references
;
 Gabe, E.J., Le Page, Y., Charland,.J.-P., Lee, F.L. and White, P.S.
 (1989) J. Appl. Cryst., 22, 384-387.

 Flack, H., (1983) Acta Cryst., A39, 876-881.

 International Tables for X-ray Crystallography, Vol. IV, (1974)
 Kynoch Press, Birmingham, England.

 Johnson, C.K., (1976) ORTEP - A Fortran Thermal Ellipsoid Plot
 Program, Technical Report ORNL-5138, Oak Ridge National Lab., U.S.A.

 Larson, A.C., (1970) p.293, Crystallographic Computing, Munksgaard,
 Copenhagen.

 Le Page, Y., (1988) J. Appl. Cryst., 21, 983-984.

 Le Page, Y. and Gabe, E.J., (1979) J. Appl. Cryst., 12, 464-466.

 Rogers, D., (1981) Acta Cryst., A37, 734-741.

 ?  #Insert any other references here
;
_publ_section_figure_captions
;
 ?  #Insert figure captions here if wanted
;
_publ_section_acknowledgements
;
 ?  #Insert any acknowledgements here.
;

#===============================================================================

# Data for the HMPB complex, stucture 5, are followed by the data for
# the HMPE complex, structure 6.

data_?

#===============================================================================

# 5. CHEMICAL DATA FOR STRUCTURE 5
  
_chemical_name_systematic
; 
 ?  #Insert the chemical name here.
; 
_chemical_name_common             ?
_chemical_formula_moiety         'C20 H32 O10 P4 Re I '
_chemical_formula_structural     ?
_chemical_formula_analytical     ?
_chemical_formula_sum            'C20 H32 O10 P4 Re I '
_chemical_formula_weight         869.47
_chemical_compound_source        ?
  
loop_
     _atom_type_symbol
     _atom_type_description
     _atom_type_scat_dispersion_real
     _atom_type_scat_dispersion_imag
     _atom_type_scat_source
  C     ?  0.002  0.002 'International Tables Vol. IV Table 2.2B'
  H     ?  0.000  0.000 'International Tables Vol. IV Table 2.2B'
  O     ?  0.008  0.006 'International Tables Vol. IV Table 2.2B'
  P     ?  0.090  0.095 'International Tables Vol. IV Table 2.2B'
  Re    ? -1.598  7.232 'International Tables Vol. IV Table 2.2B'
  I     ? -0.726  1.812 'International Tables Vol. IV Table 2.2B'

#===============================================================================

# 6. CRYSTAL DATA

_symmetry_cell_setting            Monoclinic   
_symmetry_space_group_name_H-M    'C 2/c'

loop_
     _symmetry_equiv_pos_as_xyz
  
   x,y,z
   -x,-y,-z
   1/2+x,1/2+y,z
   1/2-x,1/2-y,-z
   -x,y,1/2-z
   x,-y,1/2+z
   1/2-x,1/2+y,1/2-z
   1/2+x,1/2-y,1/2+z
_cell_length_a                     23.906(5)
_cell_length_b                      7.0493(6)
_cell_length_c                     17.024(4)
_cell_angle_alpha                  90.0
_cell_angle_beta                  105.929(9)
_cell_angle_gamma                  90.0
_cell_volume                     2758.7(9)
_cell_formula_units_Z               4
_cell_measurement_temperature      293
_cell_measurement_reflns_used      25
_cell_measurement_theta_min        10.00
_cell_measurement_theta_max        15.00
_cell_special_details
; 
 ?  #Insert any comments here.
; 
_exptl_crystal_description        ?
_exptl_crystal_colour             ?
_exptl_crystal_size_max           0.15
_exptl_crystal_size_mid           0.35
_exptl_crystal_size_min           0.40
_exptl_crystal_size_rad           ?
_exptl_crystal_density_meas       ?
_exptl_crystal_density_diffrn     2.093
_exptl_crystal_density_method     ?
_exptl_crystal_F_000             1674.18
_exptl_absorpt_coefficient_mu     4.74
_exptl_absorpt_correction_type    empirical
_exptl_absorpt_correction_T_min   0.6349
_exptl_absorpt_correction_T_max   0.9939
  
#===============================================================================
  
# 7. EXPERIMENTAL DATA
  
_exptl_special_details
; 
 ?  #Insert any special details here.
; 
  
_diffrn_ambient_temperature      293
_diffrn_radiation_wavelength     0.70930
_diffrn_radiation_type           'Molybdenum K\a'
_diffrn_radiation_source         'xray tube'
  
_diffrn_radiation_monochromator  graphite
_diffrn_measurement_device       'Nonius CAD-4    '
_diffrn_measurement_method       'Theta/2theta scan b/P/b '
_diffrn_standards_number           3
_diffrn_standards_interval_time   60
_diffrn_standards_decay_%          0.0
loop_
     _diffrn_standard_refln_index_h
     _diffrn_standard_refln_index_k
     _diffrn_standard_refln_index_l
      1   3   5
     -5   3   5
     -7   3   5
  
_diffrn_reflns_number             2554
_diffrn_reflns_av_R_equivalents  0.021
_diffrn_reflns_av_sigmaI/netI    ?
_diffrn_reflns_limit_h_min      -28
_diffrn_reflns_limit_h_max       27
_diffrn_reflns_limit_k_min        0
_diffrn_reflns_limit_k_max        8
_diffrn_reflns_limit_l_min        0
_diffrn_reflns_limit_l_max       20
_diffrn_reflns_theta_min         0.00
_diffrn_reflns_theta_max        24.91
_diffrn_reflns_reduction_process ?
  
_reflns_number_total              2421
_reflns_number_observed           2280
_reflns_observed_criterion       'Inet > 2.0\s(Inet)'
  
_computing_data_collection       ?
_computing_cell_refinement       ?
_computing_data_reduction        'NRCVAX DATRD2'
_computing_structure_solution    'NRCVAX SOLVER'
_computing_structure_refinement  'NRCVAX LSTSQ'
_computing_molecular_graphics    'NRCVAX'
_computing_publication_material  'NRCVAX TABLES'
  
#===============================================================================
  
# 8. REFINEMENT DATA
  
_refine_special_details
; 
 ?  #Insert any special details here.
; 
  
_refine_ls_structure_factor_coef  F
_refine_ls_matrix_type            full
_refine_ls_weighting_scheme       1/(\s^2^(F)+0.0003F^2^)
_refine_ls_hydrogen_treatment     ?
_refine_ls_extinction_method      ?
_refine_ls_extinction_coef        ?
_refine_ls_number_reflns          2280
_refine_ls_number_parameters       174
_refine_ls_number_restraints      ?
_refine_ls_number_constraints     ?
_refine_ls_R_factor_all           0.019
_refine_ls_R_factor_obs           0.019
_refine_ls_wR_factor_all          0.027
_refine_ls_wR_factor_obs          0.027
_refine_ls_goodness_of_fit_all    ?
_refine_ls_goodness_of_fit_obs    1.21
_refine_ls_restrained_S_all       ?
_refine_ls_restrained_S_obs       ?
_refine_ls_shift/esd_max          0.011
_refine_ls_shift/esd_mean         ?
_refine_diff_density_max          0.35
_refine_diff_density_min         -1.04
  
#===============================================================================
  
# 9. ATOMIC COORDINATES AND THERMAL PARAMETERS
  
loop_
     _atom_site_label
     _atom_site_fract_x
     _atom_site_fract_y
     _atom_site_fract_z
     _atom_site_U_iso_or_equiv
     _atom_site_thermal_displace_type
     _atom_site_calc_flag
     _atom_site_refinement_flags
     _atom_site_type_symbol
Re  0.75000  0.25000  0.00000  0.01670(12)  Uij  ?   S  Re
P1  0.84158(3)  0.29557(12)  0.10771(5)  0.0213(4)  Uij  ?   .  P
P2  0.68057(3)  0.36459(10)  0.07213(4)  0.0208(4)  Uij  ?   .  P
O1  0.89997(11)  0.1539(4)  0.25653(14)  0.0458(14)  Uij  ?   .  O
O2  0.86102(18)  0.6703(4)  0.11214(19)  0.080(3)  Uij  ?   .  O
O3  0.74116(11)  0.3523(4)  0.22577(15)  0.0392(14)  Uij  ?   .  O
O4  0.72382(12)  0.7154(4)  0.11879(16)  0.0353(14)  Uij  ?   .  O
O5  0.74284(8)  0.0189(3)  0.03817(12)  0.0267(10)  Uij  ?   .  O
C1  0.85174(13)  0.1151(5)  0.18887(19)  0.0314(16)  Uij  ?   .  C
C2  0.85377(13)  0.5229(5)  0.16262(20)  0.0325(16)  Uij  ?   .  C
C3  0.69001(18)  0.2708(5)  0.17547(24)  0.0314(19)  Uij  ?   .  C
C4  0.67086(14)  0.6228(4)  0.07953(20)  0.0307(16)  Uij  ?   .  C
C5  0.90283(15)  0.2731(4)  0.06434(22)  0.0258(16)  Uij  ?   .  C
C6  0.95919(13)  0.3198(5)  0.10913(20)  0.0325(17)  Uij  ?   .  C
C7  1.00481(15)  0.3028(6)  0.0736(3)  0.0392(20)  Uij  ?   .  C
C8  0.50514(20)  0.2590(5)  0.0059(3)  0.0399(22)  Uij  ?   .  C
C9  0.56079(15)  0.3084(5)  0.05078(21)  0.0333(18)  Uij  ?   .  C
C10  0.60722(13)  0.2921(5)  0.01661(19)  0.0243(15)  Uij  ?   .  C
I  0.00000  0.80200(6)  0.25000  0.04299(21)  Uij  ?   S  I
HO1  0.9269(16)  0.073(6)  0.2540(24)  0.0535  Uiso  ?  .  H
HO2  0.820  0.729  0.075  0.0877  Uiso  ?  .  H
HO3  0.7495(22)  0.302(7)  0.261(3)  0.0475  Uiso  ?  .  H
HO4  0.7295(18)  0.797(6)  0.093(3)  0.0444  Uiso  ?  .  H
H1A  0.858 -0.021  0.163  0.0406  Uiso  ?  .  H
H1B  0.813  0.112  0.210  0.0406  Uiso  ?  .  H
H2A  0.893  0.512  0.212  0.0419  Uiso  ?  .  H
H2B  0.817  0.550  0.187  0.0419  Uiso  ?  .  H
H3A  0.694  0.118  0.175  0.0416  Uiso  ?  .  H
H3B  0.653  0.308  0.197  0.0416  Uiso  ?  .  H
H4A  0.640  0.650  0.114  0.0407  Uiso  ?  .  H
H4B  0.655  0.680  0.019  0.0407  Uiso  ?  .  H
H6  0.967  0.368  0.171  0.0418  Uiso  ?  .  H
H7  1.048  0.341  0.108  0.0486  Uiso  ?  .  H
H8  0.469  0.270  0.033  0.0507  Uiso  ?  .  H
H9  0.568  0.360  0.113  0.0437  Uiso  ?  .  H
  
loop_
     _atom_site_aniso_label
     _atom_site_aniso_U_11
     _atom_site_aniso_U_22
     _atom_site_aniso_U_33
     _atom_site_aniso_U_12
     _atom_site_aniso_U_13
     _atom_site_aniso_U_23
     _atom_site_aniso_type_symbol
Re 0.02004(12) 0.01651(12) 0.01297(12) -0.00175(10) 0.00707(15) 0.00064(9) Re
P1 0.0232(4) 0.0222(3) 0.0165(4) -0.0009(7) 0.0043(6) -0.0041(7) P
P2 0.0242(4) 0.0218(3) 0.0166(4) -0.0006(6) 0.0118(6) -0.0013(5) P
O1 0.0442(15) 0.0609(19) 0.0252(12) 0.031(3) -0.0052(21) 0.0082(24) O
O2 0.148(3) 0.0299(16) 0.0555(19) -0.009(4) 0.037(4) 0.005(3) O
O3 0.0429(14) 0.0501(16) 0.0195(12) -0.0019(23) -0.0004(21) 0.0153(21) O
O4 0.0516(16) 0.0245(10) 0.0271(13) -0.0212(24) 0.0122(23) 0.0072(21) O
O5 0.0317(11) 0.0228(10) 0.0244(11) -0.0026(17) 0.0119(17) 0.0099(17) O
C1 0.0351(17) 0.0335(17) 0.0232(16) 0.008(3) 0.008(3) 0.013(3) C
C2 0.0347(16) 0.0261(16) 0.0349(18) -0.006(3) 0.013(3) -0.018(3) C
C3 0.0377(21) 0.0353(19) 0.0216(18) 0.001(3) 0.018(3) 0.0104(24) C
C4 0.0343(16) 0.0232(15) 0.0345(17) 0.001(3) 0.019(3) -0.004(3) C
C5 0.0250(17) 0.0272(16) 0.0242(18) 0.0000(23) 0.010(3) 0.0009(24) C
C6 0.0267(16) 0.0368(19) 0.0318(17) -0.004(3) 0.008(3) -0.001(3) C
C7 0.0256(17) 0.0400(17) 0.0503(23) -0.008(3) 0.015(3) 0.004(4) C
C8 0.0284(20) 0.047(3) 0.046(3) 0.006(3) 0.029(4) 0.011(3) C
C9 0.0304(17) 0.0369(17) 0.0338(19) 0.005(3) 0.022(3) 0.003(3) C
C10 0.0262(16) 0.0230(13) 0.0238(16) -0.001(3) 0.014(3) 0.003(3) C
I 0.03291(19) 0.04326(20) 0.05153(23) 0.00000 0.0189(3) 0.00000 I
  
#===============================================================================
  
# 10. MOLECULAR GEOMETRY
  
loop_
     _geom_bond_atom_site_label_1
     _geom_bond_atom_site_label_2
     _geom_bond_distance
     _geom_bond_site_symmetry_1
     _geom_bond_site_symmetry_2
     _geom_bond_publ_flag
  Re P1   2.4608(9)  ?  ?  ?
  Re P1a  2.4608(9)  ?  ?  ?
  Re P2   2.4564(8)  ?  ?  ?
  Re P2a  2.4564(8)  ?  ?  ?
  Re O5   1.7792(20)  ?  ?  ?
  Re O5a  1.7792(20)  ?  ?  ?
  P1 C1   1.844(3)  ?  ?  ?
  P1 C2   1.837(3)  ?  ?  ?
  P1 C5   1.819(4)  ?  ?  ?
  P2 C3   1.834(4)  ?  ?  ?
  P2 C4   1.844(3)  ?  ?  ?
  P2 C10  1.822(3)  ?  ?  ?
  O1 C1   1.415(4)  ?  ?  ?
  O1 Ho1  0.87(4)  ?  ?  ?
  O2 C2   1.389(5)  ?  ?  ?
  O2 Ho2  1.080(4)  ?  ?  ?
  O3 C3   1.408(5)  ?  ?  ?
  O3 Ho3  0.67(5)  ?  ?  ?
  O4 C4   1.418(4)  ?  ?  ?
  O4 Ho4  0.76(4)  ?  ?  ?
  C1 H1a  1.080(3)  ?  ?  ?
  C1 H1b  1.080(3)  ?  ?  ?
  C2 H2a  1.080(3)  ?  ?  ?
  C2 H2b  1.080(3)  ?  ?  ?
  C3 H3a  1.080(3)  ?  ?  ?
  C3 H3b  1.080(4)  ?  ?  ?
  C4 H4a  1.080(3)  ?  ?  ?
  C4 H4b  1.080(3)  ?  ?  ?
  C5 C6   1.393(5)  ?  ?  ?
  C5 C10a 1.409(5)  ?  ?  ?
  C6 C7   1.390(5)  ?  ?  ?
  C6 H6   1.080(3)  ?  ?  ?
  C7 C8a  1.379(7)  ?  ?  ?
  C7 H7   1.080(4)  ?  ?  ?
  C8 C7a  1.379(7)  ?  ?  ?
  C8 C9   1.385(6)  ?  ?  ?
  C8 H8   1.080(5)  ?  ?  ?
  C9 C10  1.392(5)  ?  ?  ?
  C9 H9   1.080(3)  ?  ?  ?
  C10 C5a 1.409(5)  ?  ?  ?
  
loop_
     _geom_contact_atom_site_label_1
     _geom_contact_atom_site_label_2
     _geom_contact_distance
     _geom_contact_site_symmetry_1
     _geom_contact_site_symmetry_2
     _geom_contact_publ_flag
    ?   ?   ?   ?   ?   ?
  
loop_
     _geom_angle_atom_site_label_1
     _geom_angle_atom_site_label_2
     _geom_angle_atom_site_label_3
     _geom_angle
     _geom_angle_site_symmetry_1
     _geom_angle_site_symmetry_2
     _geom_angle_site_symmetry_3
     _geom_angle_publ_flag
  P1 Re P1a  179.9  ?  ?  ?  ?
  P1 Re P2    99.77(3)  ?  ?  ?  ?
  P1 Re P2a   80.23(3)  ?  ?  ?  ?
  P1 Re O5    90.14(7)  ?  ?  ?  ?
  P1 Re O5a   89.86(7)  ?  ?  ?  ?
  P1a Re P2   80.23(3)  ?  ?  ?  ?
  P1a Re P2a  99.77(3)  ?  ?  ?  ?
  P1a Re O5   89.86(7)  ?  ?  ?  ?
  P1a Re O5a  90.14(7)  ?  ?  ?  ?
  P2 Re P2a  180.0  ?  ?  ?  ?
  P2 Re O5    88.43(7)  ?  ?  ?  ?
  P2 Re O5a   91.57(7)  ?  ?  ?  ?
  P2a Re O5   91.57(7)  ?  ?  ?  ?
  P2a Re O5a  88.43(7)  ?  ?  ?  ?
  O5 Re O5a  179.9  ?  ?  ?  ?
  Re P1 C1   112.05(11)  ?  ?  ?  ?
  Re P1 C2   118.51(11)  ?  ?  ?  ?
  Re P1 C5   109.69(12)  ?  ?  ?  ?
  C1 P1 C2   104.50(15)  ?  ?  ?  ?
  C1 P1 C5   106.79(15)  ?  ?  ?  ?
  C2 P1 C5   104.45(15)  ?  ?  ?  ?
  Re P2 C3   116.03(13)  ?  ?  ?  ?
  Re P2 C4   118.28(11)  ?  ?  ?  ?
  Re P2 C10  109.55(11)  ?  ?  ?  ?
  C3 P2 C4   105.95(15)  ?  ?  ?  ?
  C3 P2 C10  104.12(16)  ?  ?  ?  ?
  C4 P2 C10  101.01(15)  ?  ?  ?  ?
  C1 O1 Ho1  106(3)  ?  ?  ?  ?
  C2 O2 Ho2  113.5(3)  ?  ?  ?  ?
  C3 O3 Ho3  108(4)  ?  ?  ?  ?
  C4 O4 Ho4  110(3)  ?  ?  ?  ?
  P1 C1 O1   112.76(23)  ?  ?  ?  ?
  P1 C1 H1a  108.66(22)  ?  ?  ?  ?
  P1 C1 H1b  108.42(21)  ?  ?  ?  ?
  O1 C1 H1a  109.4(3)  ?  ?  ?  ?
  O1 C1 H1b  108.1(3)  ?  ?  ?  ?
  H1a C1 H1b 109.5(3)  ?  ?  ?  ?
  P1 C2 O2   111.52(23)  ?  ?  ?  ?
  P1 C2 H2a  108.67(23)  ?  ?  ?  ?
  P1 C2 H2b  108.70(22)  ?  ?  ?  ?
  O2 C2 H2a  107.7(3)  ?  ?  ?  ?
  O2 C2 H2b  110.7(3)  ?  ?  ?  ?
  H2a C2 H2b 109.5(3)  ?  ?  ?  ?
  P2 C3 O3   107.09(23)  ?  ?  ?  ?
  P2 C3 H3a  109.8(3)  ?  ?  ?  ?
  P2 C3 H3b  110.3(3)  ?  ?  ?  ?
  O3 C3 H3a  109.8(3)  ?  ?  ?  ?
  O3 C3 H3b  110.3(3)  ?  ?  ?  ?
  H3a C3 H3b 109.5(3)  ?  ?  ?  ?
  P2 C4 O4   111.94(22)  ?  ?  ?  ?
  P2 C4 H4a  109.18(22)  ?  ?  ?  ?
  P2 C4 H4b  108.66(22)  ?  ?  ?  ?
  O4 C4 H4a  108.9(3)  ?  ?  ?  ?
  O4 C4 H4b  108.6(3)  ?  ?  ?  ?
  H4a C4 H4b 109.5(3)  ?  ?  ?  ?
  P1 C5 C6   121.5(3)  ?  ?  ?  ?
  P1 C5 C10a 119.0(3)  ?  ?  ?  ?
  C6 C5 C10a 119.5(3)  ?  ?  ?  ?
  C5 C6 C7   119.8(3)  ?  ?  ?  ?
  C5 C6 H6   119.7(3)  ?  ?  ?  ?
  C7 C6 H6   120.4(3)  ?  ?  ?  ?
  C6 C7 C8a  120.7(3)  ?  ?  ?  ?
  C6 C7 H7   119.6(4)  ?  ?  ?  ?
  C8a C7 H7  119.7(4)  ?  ?  ?  ?
  C7a C8 C9  120.1(4)  ?  ?  ?  ?
  C7a C8 H8  120.0(4)  ?  ?  ?  ?
  C9 C8 H8   119.9(5)  ?  ?  ?  ?
  C8 C9 C10  120.3(4)  ?  ?  ?  ?
  C8 C9 H9   120.0(3)  ?  ?  ?  ?
  C10 C9 H9  119.7(3)  ?  ?  ?  ?
  P2 C10 C5a 118.70(24)  ?  ?  ?  ?
  P2 C10 C9  121.6(3)  ?  ?  ?  ?
  C5a C10 C9 119.6(3)  ?  ?  ?  ?
  
loop_
     _geom_torsion_atom_site_label_1
     _geom_torsion_atom_site_label_2
     _geom_torsion_atom_site_label_3
     _geom_torsion_atom_site_label_4
     _geom_torsion
     _geom_torsion_site_symmetry_1
     _geom_torsion_site_symmetry_2
     _geom_torsion_site_symmetry_3
     _geom_torsion_site_symmetry_4
     _geom_torsion_publ_flag
    ?   ?   ?   ?   ?   ?   ?   ?   ?   ?
  

# 5. CHEMICAL DATA FOR STRUCTURE 6

_chemical_name_systematic
;
 ?  #Insert the chemical name here.
;
_chemical_name_common             ?
_chemical_formula_moiety         'C12 H32 O10 P4 Cl2 Re '
_chemical_formula_structural     ?
_chemical_formula_analytical     ?
_chemical_formula_sum            'C12 H32 O10 P4 Cl2 Re '
_chemical_formula_weight         717.38
_chemical_compound_source        ?

loop_
     _atom_type_symbol
     _atom_type_description
     _atom_type_scat_dispersion_real
     _atom_type_scat_dispersion_imag
     _atom_type_scat_source
  C     ?  0.017  0.009 'International Tables Vol. IV Table 2.2B'
  H     ?  0.000  0.000 'International Tables Vol. IV Table 2.2B'
  O     ?  0.047  0.032 'International Tables Vol. IV Table 2.2B'
  P     ?  0.283  0.434 'International Tables Vol. IV Table 2.2B'
  Cl    ?  0.348  0.702 'International Tables Vol. IV Table 2.2B'
  Re    ? -5.790  5.891 'International Tables Vol. IV Table 2.2B'

#===============================================================================

# 6. CRYSTAL DATA

_symmetry_cell_setting            Triclinic    
_symmetry_space_group_name_H-M    'P -1'

loop_
     _symmetry_equiv_pos_as_xyz

   x,y,z
   -x,-y,-z
_cell_length_a                      6.4930(10)
_cell_length_b                      9.4880(20)
_cell_length_c                     10.5770(20)
_cell_angle_alpha                 104.430(10)
_cell_angle_beta                   96.400(10)
_cell_angle_gamma                 109.540(10)
_cell_volume                      581.00(19)
_cell_formula_units_Z               1
_cell_measurement_temperature      293
_cell_measurement_reflns_used      25
_cell_measurement_theta_min        20.00
_cell_measurement_theta_max        25.00
_cell_special_details
;
 ?  #Insert any comments here.
;
_exptl_crystal_description        ?
_exptl_crystal_colour             ?
_exptl_crystal_size_max           0.20
_exptl_crystal_size_mid           0.25
_exptl_crystal_size_min           0.35
_exptl_crystal_size_rad           ?
_exptl_crystal_density_meas       ?
_exptl_crystal_density_diffrn     2.050
_exptl_crystal_density_method     ?
_exptl_crystal_F_000              350.02
_exptl_absorpt_coefficient_mu    15.12
_exptl_absorpt_correction_type    empirical
_exptl_absorpt_correction_T_min   0.0611
_exptl_absorpt_correction_T_max   0.2159

#===============================================================================

# 7. EXPERIMENTAL DATA

_exptl_special_details
;
 ?  #Insert any special details here.
;

_diffrn_ambient_temperature      293
_diffrn_radiation_wavelength     1.54056
_diffrn_radiation_type           'Copper K\a    '
_diffrn_radiation_source         'xray tube'

_diffrn_radiation_monochromator  graphite
_diffrn_measurement_device       'Nonius CAD-4    '
_diffrn_measurement_method       'Theta/2theta scan b/P/b '
_diffrn_standards_number           3
_diffrn_standards_interval_time   60
_diffrn_standards_decay_%          0.0
loop_
     _diffrn_standard_refln_index_h
     _diffrn_standard_refln_index_k
     _diffrn_standard_refln_index_l
     -5   1   5
     -4  -2   5
      1   4   5

_diffrn_reflns_number             1898
_diffrn_reflns_av_R_equivalents  0.026
_diffrn_reflns_av_sigmaI/netI    ?
_diffrn_reflns_limit_h_min       -7
_diffrn_reflns_limit_h_max        6
_diffrn_reflns_limit_k_min        0
_diffrn_reflns_limit_k_max       10
_diffrn_reflns_limit_l_min      -11
_diffrn_reflns_limit_l_max       11
_diffrn_reflns_theta_min         0.00
_diffrn_reflns_theta_max        59.85
_diffrn_reflns_reduction_process ?

_reflns_number_total              1724
_reflns_number_observed           1724
_reflns_observed_criterion       'Inet > 2.0\s(Inet)'

_computing_data_collection       ?
_computing_cell_refinement       ?
_computing_data_reduction        'NRCVAX DATRD2'
_computing_structure_solution    'NRCVAX SOLVER'
_computing_structure_refinement  'NRCVAX LSTSQ'
_computing_molecular_graphics    'NRCVAX'
_computing_publication_material  'NRCVAX TABLES Jan 94 Version'

#===============================================================================

# 8. REFINEMENT DATA

_refine_special_details
;
 ?  #Insert any special details here.
;

_refine_ls_structure_factor_coef  F
_refine_ls_matrix_type            full
_refine_ls_weighting_scheme       1/(\s^2^(F)+0.0010F^2^)
_refine_ls_hydrogen_treatment     ?
_refine_ls_extinction_method      Larson
_refine_ls_extinction_coef        27198(1597)
_refine_ls_number_reflns          1724
_refine_ls_number_parameters       134
_refine_ls_number_restraints      ?
_refine_ls_number_constraints     ?
_refine_ls_R_factor_all           0.045
_refine_ls_R_factor_obs           0.045
_refine_ls_wR_factor_all          0.060
_refine_ls_wR_factor_obs          0.060
_refine_ls_goodness_of_fit_all    ?
_refine_ls_goodness_of_fit_obs    1.89
_refine_ls_restrained_S_all       ?
_refine_ls_restrained_S_obs       ?
_refine_ls_shift/esd_max          0.025
_refine_ls_shift/esd_mean         ?
_refine_diff_density_max          3.47
_refine_diff_density_min         -2.45

#===============================================================================

# 9. ATOMIC COORDINATES AND THERMAL PARAMETERS

loop_
     _atom_site_label
     _atom_site_fract_x
     _atom_site_fract_y
     _atom_site_fract_z
     _atom_site_U_iso_or_equiv
     _atom_site_thermal_displace_type
     _atom_site_calc_flag
     _atom_site_refinement_flags
     _atom_site_type_symbol
Re  0.00000  0.00000  0.00000  0.0225(4)  Uij  ?   S  Re
P1  0.2163(3)  0.25367(22)  0.17588(18)  0.0296(11)  Uij  ?   .  P
P2 -0.0885(3) -0.07824(22)  0.19992(17)  0.0274(11)  Uij  ?   .  P
O1  0.2327(8) -0.0577(6)  0.0140(5)  0.034(3)  Uij  ?   .  O
O2  0.6400(12)  0.4249(9)  0.3233(7)  0.064(4)  Uij  ?   .  O
O3  0.2852(17)  0.4920(7)  0.0758(7)  0.072(6)  Uij  ?   .  O
O4 -0.5360(9) -0.1962(6)  0.1266(6)  0.040(3)  Uij  ?   .  O
O5 -0.1000(12) -0.2818(7)  0.3401(6)  0.050(4)  Uij  ?   .  O
C1  0.1478(15)  0.2374(10)  0.3364(8)  0.044(5)  Uij  ?   .  C
C2  0.1079(14)  0.0733(10)  0.3470(8)  0.041(5)  Uij  ?   .  C
C3  0.5247(14)  0.3108(10)  0.2010(9)  0.043(4)  Uij  ?   .  C
C4  0.1732(16)  0.4336(10)  0.1698(9)  0.046(5)  Uij  ?   .  C
C5 -0.3637(13) -0.0903(9)  0.2364(8)  0.037(4)  Uij  ?   .  C
C6 -0.0690(15) -0.2620(9)  0.2139(8)  0.038(5)  Uij  ?   .  C
Cl  0.3245(6) -0.2504(5)  0.4893(4)  0.0913(25)  Uij  ?   .  Cl
HO2  0.752  0.501  0.279  0.0624  Uiso  ?  .  H
HO3  0.383  0.613  0.132  0.0806  Uiso  ?  .  H
HO4 -0.564 -0.139  0.054  0.0495  Uiso  ?  .  H
HO5  0.073 -0.203  0.364  0.0622  Uiso  ?  .  H
H1A -0.004  0.260  0.345  0.0497  Uiso  ?  .  H
H1B  0.283  0.324  0.416  0.0497  Uiso  ?  .  H
H2A  0.266  0.058  0.355  0.0485  Uiso  ?  .  H
H2B  0.043  0.062  0.435  0.0485  Uiso  ?  .  H
H3A  0.580  0.356  0.121  0.0489  Uiso  ?  .  H
H3B  0.563  0.208  0.197  0.0489  Uiso  ?  .  H
H4A  0.243  0.521  0.267  0.0558  Uiso  ?  .  H
H4B -0.004  0.409  0.143  0.0558  Uiso  ?  .  H
H5A -0.373  0.024  0.256  0.0483  Uiso  ?  .  H
H5B -0.384 -0.130  0.323  0.0483  Uiso  ?  .  H
H6A  0.094 -0.261  0.201  0.0529  Uiso  ?  .  H
H6B -0.197 -0.359  0.136  0.0529  Uiso  ?  .  H

loop_
     _atom_site_aniso_label
     _atom_site_aniso_U_11
     _atom_site_aniso_U_22
     _atom_site_aniso_U_33
     _atom_site_aniso_U_12
     _atom_site_aniso_U_13
     _atom_site_aniso_U_23
     _atom_site_aniso_type_symbol
Re 0.0261(4) 0.0157(4) 0.0255(4) 0.00615(25) 0.00329(22) 0.00945(24) Re
P1 0.0359(10) 0.0166(10) 0.0311(10) 0.0040(8) 0.0045(8) 0.0076(8) P
P2 0.0338(10) 0.0208(10) 0.0280(10) 0.0075(8) 0.0053(7) 0.0125(7) P
O1 0.031(3) 0.030(3) 0.045(3) 0.0144(23) 0.0075(21) 0.0162(22) O
O2 0.055(4) 0.055(4) 0.047(4) -0.013(3) -0.011(3) 0.011(3) O
O3 0.132(7) 0.025(3) 0.055(4) 0.019(4) 0.028(4) 0.016(3) O
O4 0.038(3) 0.026(3) 0.055(3) 0.0064(22) 0.0033(24) 0.0223(24) O
O5 0.071(4) 0.045(4) 0.041(3) 0.020(3) 0.014(3) 0.027(3) O
C1 0.053(5) 0.030(4) 0.036(4) 0.001(4) 0.011(4) 0.008(3) C
C2 0.048(5) 0.033(4) 0.035(4) 0.005(4) 0.002(3) 0.014(3) C
C3 0.037(4) 0.031(4) 0.048(5) 0.001(3) 0.000(3) 0.009(3) C
C4 0.059(5) 0.025(4) 0.053(5) 0.016(4) 0.011(4) 0.009(3) C
C5 0.038(4) 0.032(4) 0.045(4) 0.010(3) 0.015(3) 0.019(3) C
C6 0.058(5) 0.030(4) 0.041(4) 0.021(4) 0.017(4) 0.025(3) C
Cl 0.0860(22) 0.0974(24) 0.0848(21) 0.0326(19) 0.0033(17) 0.0272(18) Cl

#===============================================================================

# 10. MOLECULAR GEOMETRY

loop_
     _geom_bond_atom_site_label_1
     _geom_bond_atom_site_label_2
     _geom_bond_distance
     _geom_bond_site_symmetry_1
     _geom_bond_site_symmetry_2
     _geom_bond_publ_flag
  Re P1  2.4801(19)  ?  ?  ?
  Re P1a 2.4801(19)  ?  ?  ?
  Re P2  2.4739(18)  ?  ?  ?
  Re P2a 2.4739(18)  ?  ?  ?
  Re O1  1.774(5)  ?  ?  ?
  Re O1a 1.774(5)  ?  ?  ?
  P1 C1  1.832(9)  ?  ?  ?
  P1 C3  1.860(9)  ?  ?  ?
  P1 C4  1.835(9)  ?  ?  ?
  P2 C2  1.825(8)  ?  ?  ?
  P2 C5  1.842(8)  ?  ?  ?
  P2 C6  1.830(8)  ?  ?  ?
  O2 C3  1.396(10)  ?  ?  ?
  O2 Ho2 1.080(7)  ?  ?  ?
  O3 C4  1.411(12)  ?  ?  ?
  O3 Ho3 1.080(7)  ?  ?  ?
  O4 C5  1.410(10)  ?  ?  ?
  O4 Ho4 1.080(5)  ?  ?  ?
  O5 C6  1.420(9)  ?  ?  ?
  O5 Ho5 1.080(7)  ?  ?  ?
  C1 C2  1.525(13)  ?  ?  ?
  C1 H1a 1.080(10)  ?  ?  ?
  C1 H1b 1.080(8)  ?  ?  ?
  C2 H2a 1.080(9)  ?  ?  ?
  C2 H2b 1.080(8)  ?  ?  ?
  C3 H3a 1.080(9)  ?  ?  ?
  C3 H3b 1.080(9)  ?  ?  ?
  C4 H4a 1.080(9)  ?  ?  ?
  C4 H4b 1.080(10)  ?  ?  ?
  C5 H5a 1.080(8)  ?  ?  ?
  C5 H5b 1.080(8)  ?  ?  ?
  C6 Ho5 1.601(8)  ?  ?  ?
  C6 H6a 1.080(9)  ?  ?  ?
  C6 H6b 1.080(9)  ?  ?  ?

loop_
     _geom_contact_atom_site_label_1
     _geom_contact_atom_site_label_2
     _geom_contact_distance
     _geom_contact_site_symmetry_1
     _geom_contact_site_symmetry_2
     _geom_contact_publ_flag
    ?   ?   ?   ?   ?   ?

loop_
     _geom_angle_atom_site_label_1
     _geom_angle_atom_site_label_2
     _geom_angle_atom_site_label_3
     _geom_angle
     _geom_angle_site_symmetry_1
     _geom_angle_site_symmetry_2
     _geom_angle_site_symmetry_3
     _geom_angle_publ_flag
  P1 Re P1a  180.0  ?  ?  ?  ?
  P1 Re P2    80.48(6)  ?  ?  ?  ?
  P1 Re P2a   99.52(6)  ?  ?  ?  ?
  P1 Re O1    90.66(17)  ?  ?  ?  ?
  P1 Re O1a   89.34(17)  ?  ?  ?  ?
  P1a Re P2   99.52(6)  ?  ?  ?  ?
  P1a Re P2a  80.48(6)  ?  ?  ?  ?
  P1a Re O1   89.34(17)  ?  ?  ?  ?
  P1a Re O1a  90.66(17)  ?  ?  ?  ?
  P2 Re P2a  179.9  ?  ?  ?  ?
  P2 Re O1    88.81(17)  ?  ?  ?  ?
  P2 Re O1a   91.19(17)  ?  ?  ?  ?
  P2a Re O1   91.19(17)  ?  ?  ?  ?
  P2a Re O1a  88.81(17)  ?  ?  ?  ?
  O1 Re O1a  180.0  ?  ?  ?  ?
  Re P1 C1   108.9(3)  ?  ?  ?  ?
  Re P1 C3   114.0(3)  ?  ?  ?  ?
  Re P1 C4   120.9(3)  ?  ?  ?  ?
  C1 P1 C3   105.7(4)  ?  ?  ?  ?
  C1 P1 C4   101.8(4)  ?  ?  ?  ?
  C3 P1 C4   104.0(4)  ?  ?  ?  ?
  Re P2 C2   108.2(3)  ?  ?  ?  ?
  Re P2 C5   116.6(3)  ?  ?  ?  ?
  Re P2 C6   118.4(3)  ?  ?  ?  ?
  C2 P2 C5   103.3(4)  ?  ?  ?  ?
  C2 P2 C6   104.8(4)  ?  ?  ?  ?
  C5 P2 C6   103.9(4)  ?  ?  ?  ?
  C3 O2 Ho2   94.1(6)  ?  ?  ?  ?
  C4 O3 Ho3  102.5(6)  ?  ?  ?  ?
  C5 O4 Ho4  110.7(5)  ?  ?  ?  ?
  C6 O5 Ho5   78.3(5)  ?  ?  ?  ?
  P1 C1 C2   111.4(6)  ?  ?  ?  ?
  P1 C1 H1a  108.9(7)  ?  ?  ?  ?
  P1 C1 H1b  109.1(6)  ?  ?  ?  ?
  C2 C1 H1a  108.2(7)  ?  ?  ?  ?
  C2 C1 H1b  109.9(8)  ?  ?  ?  ?
  H1a C1 H1b 109.5(7)  ?  ?  ?  ?
  P2 C2 C1   111.3(6)  ?  ?  ?  ?
  P2 C2 H2a  108.8(6)  ?  ?  ?  ?
  P2 C2 H2b  109.6(6)  ?  ?  ?  ?
  C1 C2 H2a  108.3(7)  ?  ?  ?  ?
  C1 C2 H2b  109.3(7)  ?  ?  ?  ?
  H2a C2 H2b 109.5(7)  ?  ?  ?  ?
  P1 C3 O2   112.9(6)  ?  ?  ?  ?
  P1 C3 H3a  108.5(6)  ?  ?  ?  ?
  P1 C3 H3b  108.5(6)  ?  ?  ?  ?
  O2 C3 H3a  108.8(7)  ?  ?  ?  ?
  O2 C3 H3b  108.5(7)  ?  ?  ?  ?
  H3a C3 H3b 109.5(8)  ?  ?  ?  ?
  P1 C4 O3   109.1(6)  ?  ?  ?  ?
  P1 C4 H4a  109.4(7)  ?  ?  ?  ?
  P1 C4 H4b  109.7(6)  ?  ?  ?  ?
  O3 C4 H4a  108.5(8)  ?  ?  ?  ?
  O3 C4 H4b  110.6(8)  ?  ?  ?  ?
  H4a C4 H4b 109.5(8)  ?  ?  ?  ?
  P2 C5 O4   110.3(5)  ?  ?  ?  ?
  P2 C5 H5a  109.4(5)  ?  ?  ?  ?
  P2 C5 H5b  109.3(6)  ?  ?  ?  ?
  O4 C5 H5a  109.0(7)  ?  ?  ?  ?
  O4 C5 H5b  109.4(6)  ?  ?  ?  ?
  H5a C5 H5b 109.5(7)  ?  ?  ?  ?
  P2 C6 O5   111.7(5)  ?  ?  ?  ?
  P2 C6 Ho5  100.3(4)  ?  ?  ?  ?
  P2 C6 H6a  108.9(5)  ?  ?  ?  ?
  P2 C6 H6b  108.8(6)  ?  ?  ?  ?
  O5 C6 Ho5   41.3(3)  ?  ?  ?  ?
  O5 C6 H6a  109.1(7)  ?  ?  ?  ?
  O5 C6 H6b  108.8(7)  ?  ?  ?  ?
  Ho5 C6 H6a  76.5(5)  ?  ?  ?  ?
  Ho5 C6 H6b 145.7(6)  ?  ?  ?  ?
  H6a C6 H6b 109.5(7)  ?  ?  ?  ?
  O5 Ho5 C6   60.3(4)  ?  ?  ?  ?
  O5 Ho5 Cl  119.0(3)  ?  ?  ?  ?

loop_
     _geom_torsion_atom_site_label_1
     _geom_torsion_atom_site_label_2
     _geom_torsion_atom_site_label_3
     _geom_torsion_atom_site_label_4
     _geom_torsion
     _geom_torsion_site_symmetry_1
     _geom_torsion_site_symmetry_2
     _geom_torsion_site_symmetry_3
     _geom_torsion_site_symmetry_4
     _geom_torsion_publ_flag
    ?   ?   ?   ?   ?   ?   ?   ?   ?   ?

#===============================================================================
# Additional structures (sections 5-10 and associated data_? identifiers)
# may be added at this point.
#===============================================================================

# The following lines are used to test the character set of files sent by
# network email or other means. They are not part of the CIF data set.
# abcdefghijklmnopqrstuvwxyzABCDEFGHIJKLMNOPQRSTUVWXYZ0123456789
# !@#$%^&*()_+{}:"~<>?|\-=[];,./
